# Supplementary material
Source: publisher site journal article supplement (https://www.dovepress.com/article/supplementary_file/605739/605739%20Supplementary%20Material.docx)
Supplement: Supplementary file 1 [file 605739%20Supplementary%20Material.docx]

**Supplementary Material**

**Search Strategy**

Using PubMed as an example, the literature search was conducted by combining controlled vocabulary (MeSH terms) with free-text terms.

#1 “Pulmonary Disease, Chronic Obstructive”[MeSH] OR “Chronic Obstructive Pulmonary Disease”[Title/Abstract] OR “Chronic Obstructive Lung Disease”[Title/Abstract] OR “Chronic Obstructive Airway Disease”[Title/Abstract] OR “COPD”[Title/Abstract] OR “COAD”[Title/Abstract] OR “Chronic Airflow Obstruction”[Title/Abstract]

#2 “virtual reality”[MeSH] OR "Virtual Reality Exposure Therapy"[Mesh] OR “VR”[Title/Abstract] OR “Virtual Environment”[Title/Abstract] OR “Immersive Virtual Environment”[Title/Abstract] OR “Virtual Scene”[Title/Abstract] OR “Virtual Reality”[Title/Abstract] OR “Virtual Reality Therapy”[Title/Abstract] OR “virtual reality immersion therapy”[Title/Abstract] OR “exergam”[Title/Abstract] OR “videogame*”[Title/Abstract] OR “Virtual Reality Exposure Therapy”[Title/Abstract] OR “Virtual Reality Intervention”[Title/Abstract] OR “Reality Therapy, Virtual”[Title/Abstract] OR “Therapies, Virtual Reality”[Title/Abstract] OR “Digital Therapeutics”[Title/Abstract] OR “digital therap*”[Title/Abstract] OR “Computer-Simulated Reality”[Title/Abstract] OR “Digital Therapy”[Title/Abstract] OR “X-box 360”[Title/Abstract] OR “Kinect”[Title/Abstract] OR “Wii”[Title/Abstract] OR “Gear VR”[Title/Abstract] OR “HTC Vive”[Title/Abstract] OR “Bio Master”[Title/Abstract] OR “interactive videogame”[Title/Abstract] OR “interactive game*”[Title/Abstract] OR “Exergaming”[Title/Abstract]

#3 “Anxiety”[MeSH] OR “Depression”[MeSH] OR “anxiety”[Title/Abstract] OR “depression”[Title/Abstract] OR “depressive”[Title/Abstract] OR “Anxiety Symptom”[Title/Abstract] OR “Depressive Symptom”[Title/Abstract] OR “Negative Emotions”[Title/Abstract]

#4 #1 AND #2 AND #3
